# Supplementary material for: Proton-transfer regulated magnetic coupling characteristics in Blatter-based diradicals
Source: Royal Society of Chemistry journal article supplement (doi:10.1039/d3nj00225j), 2023-01-01
Supplement: d3nj00225j1.pdf [file d3nj00225j1.pdf]

**Proton-Transfer Regulated Magnetic Coupling Characteristics in Blatter-Based  
Diradicals**

Rabia Malik, Yuxiang Bu\*

*School of Chemistry and Chemical Engineering, Shandong University, Jinan 250100,  
People's Republic of China*

**Supporting Information**

**Contents**

- 1. Relevant Data for Describing the Ground States of All Diradicals and their Magnetic behaviors**
- 2. Optimized Molecular Geometries of All Diradicals**
- 3. Spin Density Plots of Energetically Favorable and Unfavorable Spin State**
- 4. SOMO Plots for All Diradicals**
- 5. Spin Alteration Plots and Spin Density Distributions**

**1. Relevant Data for Describing the Grounds States for All Designed Diradicals, and Their Magnetic Behaviors**

**Table S1.** All estimated energies (in a.u.) of the Broken-symmetry open-shell singlet (BS), and triplet (T) state, corresponding  $\langle S^2 \rangle$  values, Magnetic Coupling Constants ( $J/\text{cm}^{-1}$ ) for all diradicals calculated at (U)B3LYP/6-31G (d, p) level.

| <b>NO-BI</b>        | <b><math>E_{(T)}/(\text{au}) (\langle S^2 \rangle)</math></b> | <b><math>E_{(BS)}/(\text{au}) (\langle S^2 \rangle)</math></b> | <b><math>J/\text{cm}^{-1}</math></b> |
|---------------------|---------------------------------------------------------------|----------------------------------------------------------------|--------------------------------------|
| <b>NO-BI-OH(B)</b>  | -1101.8284129(2.019)                                          | -1101.8375330(0.695)                                           | -1510.9                              |
| <b>NO-BIH-O(B)</b>  | -1101.8134497(2.027)                                          | -1101.8195260(0.814)                                           | -1099.4                              |
| <b>NO-BI-OH(C)</b>  | -1101.8287307(2.026)                                          | -1101.8326996(0.505)                                           | -777.5                               |
| <b>NO-BIH-O(C)</b>  | -1101.8111466(2.026)                                          | -1101.8140490(0.942)                                           | -587.9                               |
| <b>NN-BI</b>        | <b><math>E_{(T)}/(\text{au}) (\langle S^2 \rangle)</math></b> | <b><math>E_{(BS)}/(\text{au}) (\langle S^2 \rangle)</math></b> | <b><math>J/\text{cm}^{-1}</math></b> |
| <b>NN-BI-OH(B)</b>  | -1347.8774827(2.082)                                          | -1347.8748705(1.065)                                           | 563.7                                |
| <b>NN-BIH-O(B)</b>  | -1347.8570165(2.075)                                          | -1347.8553303(1.075)                                           | 369.2                                |
| <b>NN-BI-OH(C)</b>  | -1347.8773397(2.086)                                          | -1347.8759719(1.072)                                           | 296.1                                |
| <b>NN-BIH-O(C)</b>  | -1347.8593919(2.084)                                          | -1347.8584158(1.073)                                           | 211.9                                |
| <b>IN-BI</b>        | <b><math>E_{(T)}/(\text{au}) (\langle S^2 \rangle)</math></b> | <b><math>E_{(BS)}/(\text{au}) (\langle S^2 \rangle)</math></b> | <b><math>J/\text{cm}^{-1}</math></b> |
| <b>IN-BI-OH(B)</b>  | -1272.7085966(2.040)                                          | -1272.7074650(1.025)                                           | 244.7                                |
| <b>IN-BIH-O(B)</b>  | -1272.6881220(2.036)                                          | -1272.6875424(1.030)                                           | 126.5                                |
| <b>IN-BI-OH(C)</b>  | -1272.7083914(2.040)                                          | -1272.7078886(1.030)                                           | 109.2                                |
| <b>IN-BIH-O(C)</b>  | -1272.6905787(2.038)                                          | -1272.6902038(1.031)                                           | 81.7                                 |
| <b>VER-BI</b>       | <b><math>E_{(T)}/(\text{au}) (\langle S^2 \rangle)</math></b> | <b><math>E_{(BS)}/(\text{au}) (\langle S^2 \rangle)</math></b> | <b><math>J/\text{cm}^{-1}</math></b> |
| <b>VER-BI-OH(B)</b> | -1268.8714601(2.052)                                          | -1268.8701887(1.037)                                           | 274.9                                |
| <b>VER-BIH-O(B)</b> | -1268.8523045(2.050)                                          | -1268.8510676(1.043)                                           | 270.9                                |
| <b>VER-BI-OH(C)</b> | -1268.8714188(2.051)                                          | -1268.8707135(1.043)                                           | 153.5                                |
| <b>VER-BIH-O(C)</b> | -1268.8533438(2.051)                                          | -1268.8527730(1.043)                                           | 124.4                                |

**Table S2.** The energies (in a.u.) of the broken-symmetry (BS) open-shell singlet and triplet (T) state, corresponding  $\langle S^2 \rangle$  values, intramolecular magnetic coupling constants ( $J'/\text{cm}^{-1}$ ) for all diradicals calculated at the (U)M06-2X/6-31G(d,p) level.

| Types        | $E_{(T)} (\langle S^2 \rangle)$<br>(au) | $E_{(BS)} (\langle S^2 \rangle)$<br>(au) | $J'$<br>( $\text{cm}^{-1}$ ) |
|--------------|-----------------------------------------|------------------------------------------|------------------------------|
| NO-BI-OH(B)  | -1101.3799286(2.022)                    | -1101.3870711(0.875)                     | -1366.9                      |
| NO-BIH-O(B)  | -1101.3598321(2.035)                    | -1101.3650475(0.913)                     | -1020.2                      |
| NO-BI-OH(C)  | -1101.3799494(2.027)                    | -1101.3827258(0.988)                     | -586.5                       |
| NO-BIH-O(C)  | -1101.3571968(2.033)                    | -1101.3589684(1.013)                     | -381.0                       |
| NN-BI-OH(B)  | -1347.3285495(2.125)                    | -1347.3245745(1.002)                     | 776.9                        |
| NN-BIH-O(B)  | -1347.3034188(2.123)                    | -1347.3015246(1.125)                     | 416.5                        |
| NN-BI-OH(C)  | -1347.3271523(2.129)                    | -1347.3258318(1.114)                     | 285.5                        |
| NN-BIH-O(C)  | -1347.3040791(2.132)                    | -1347.3032643(1.121)                     | 176.9                        |
| IN-BI-OH(B)  | -1272.1908178(2.040)                    | -1272.1900430(1.030)                     | 168.3                        |
| IN-BIH-O(B)  | -1272.1658036(2.043)                    | -1272.1653656(1.041)                     | 95.90                        |
| VER-BI-OH(B) | -1268.3572773(2.062)                    | -1268.3554399(1.048)                     | 397.6                        |
| VER-BIH-O(B) | -1268.3328822(2.059)                    | -1268.3316553(1.059)                     | 269.3                        |

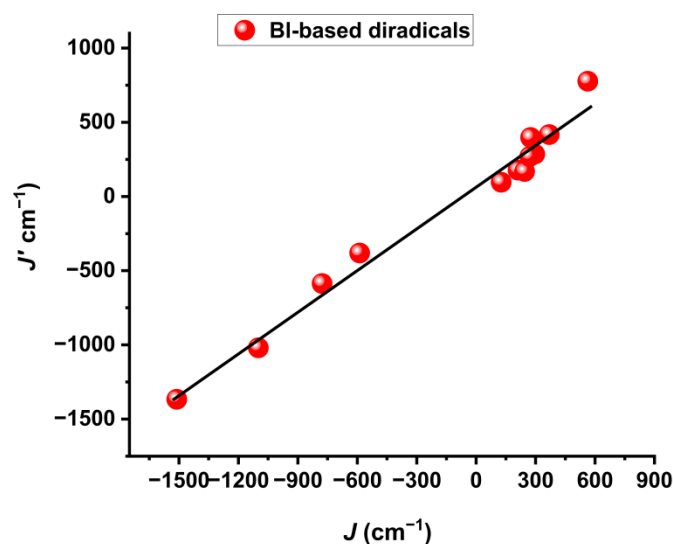

**Figure S1.** A linear correlation between the  $J$  values of selected Blatter diradicals (also presented in Table 1) calculated at the B3LYP/6-31G(d,p) level and those ( $J'$  values) calculated at the M06-2X/6-31G(d,p) level.

**Table S3.** All calculated energies of open-shell singlet (BS) and triplet (T) states, along with  $\langle S^2 \rangle$  values, Magnetic Coupling Constants ( $J/\text{cm}^{-1}$ ) for all diradicals as well as singlet-triplet energy gaps ( $\Delta E_{\text{ST}}$ ) at the (U)B3LYP/6-31G (d, p) level.

| Types               | $E_{(T)} (\langle S^2 \rangle)$<br>(au) | $E_{(BS)} (\langle S^2 \rangle)$<br>(au) | $J$<br>( $\text{cm}^{-1}$ ) | $\Delta E_{\text{ST}}$<br>(kcal/mol) |
|---------------------|-----------------------------------------|------------------------------------------|-----------------------------|--------------------------------------|
| <b>NN-BI-OH(B)</b>  | -1347.8774827(2.082)                    | -1347.8748705(1.065)                     | 563.7                       | 3.36                                 |
| <b>NN-BIH-O(B)</b>  | -1347.8570165(2.075)                    | -1347.8553303(1.075)                     | 369.2                       | 2.19                                 |
| <b>NN-BI-OH(C)</b>  | -1347.8773397(2.086)                    | -1347.8759719(1.072)                     | 296.1                       | 1.77                                 |
| <b>NN-BIH-O(C)</b>  | -1347.8593919(2.084)                    | -1347.8584158(1.073)                     | 211.9                       | 1.26                                 |
| <b>NO-BI-OH(B)</b>  | -1101.8284129(2.019)                    | -1101.8375330(0.695)                     | -1510.9                     | -8.72                                |
| <b>NO-BIH-O(B)</b>  | -1101.8134497(2.027)                    | -1101.8195260(0.814)                     | -1099.4                     | -6.37                                |
| <b>NO-BI-OH(C)</b>  | -1101.8287307(2.026)                    | -1101.8326996(0.505)                     | -777.5                      | -4.50                                |
| <b>NO-BIH-O(C)</b>  | -1101.8111466(2.026)                    | -1101.8140490(0.942)                     | -587.9                      | -3.40                                |
| <b>IN-BI-OH(B)</b>  | -1272.7085966(2.040)                    | -1272.7074650(1.025)                     | 244.7                       | 1.42                                 |
| <b>IN-BIH-O(B)</b>  | -1272.6881220(2.036)                    | -1272.6875424(1.030)                     | 126.5                       | 0.73                                 |
| <b>IN-BI-OH(C)</b>  | -1272.7083914(2.040)                    | -1272.7078886(1.030)                     | 109.2                       | 0.64                                 |
| <b>IN-BIH-O(C)</b>  | -1272.6905787(2.038)                    | -1272.6902038(1.031)                     | 81.7                        | 0.47                                 |
| <b>VER-BI-OH(B)</b> | -1268.8714601(2.052)                    | -1268.8701887(1.037)                     | 274.9                       | 1.61                                 |
| <b>VER-BIH-O(B)</b> | -1268.8523045(2.050)                    | -1268.8510676(1.043)                     | 270.9                       | 1.59                                 |
| <b>VER-BI-OH(C)</b> | -1268.8714188(2.051)                    | -1268.8707135(1.043)                     | 153.5                       | 0.90                                 |
| <b>VER-BIH-O(C)</b> | -1268.8533438(2.051)                    | -1268.8527730(1.043)                     | 124.4                       | 0.72                                 |

**Table S4.** Two SOMO Energies ( $E_s$ , in au) of the Triplet States, SOMO-SOMO Energy Gaps ( $\Delta E_{ss}$ , in eV), Calculated at the (U) B3LYP/6-31G (d, p) level

| Types               | $^1E_s$ (au) | $^2E_s$ (au) | $\Delta E_{ss}$ (eV) | $\Delta E_{st}$ (kcal/mol) |
|---------------------|--------------|--------------|----------------------|----------------------------|
| <b>NO-BI-OH(B)</b>  | -0.20985     | -0.16426     | 1.24                 | -8.72                      |
| <b>NO-BIH-O(B)</b>  | -0.20506     | -0.17567     | 0.79                 | -6.37                      |
| <b>NO-BI-OH(C)</b>  | -0.20784     | -0.16818     | 1.07                 | -4.50                      |
| <b>NO-BIH-O(C)</b>  | -0.19457     | -0.17884     | 0.42                 | -3.40                      |
| <b>NN-BI-OH(B)</b>  | -0.19433     | -0.16991     | 0.66                 | 3.36                       |
| <b>NN-BIH-O(B)</b>  | -0.19014     | -0.18106     | 0.42                 | 2.19                       |
| <b>NN-BI-OH(C)</b>  | -0.19661     | -0.17102     | 0.70                 | 1.77                       |
| <b>NN-BIH-O(C)</b>  | -0.19464     | -0.18334     | 0.30                 | 1.26                       |
| <b>IN-BI-OH(B)</b>  | -0.20987     | -0.16975     | 1.09                 | 1.42                       |
| <b>IN-BIH-O(B)</b>  | -0.19242     | -0.18221     | 0.28                 | 0.73                       |
| <b>IN-BI-OH(C)</b>  | -0.21231     | -0.17102     | 1.12                 | 0.64                       |
| <b>IN-BIH-O(C)</b>  | -0.19534     | -0.18373     | 0.32                 | 0.47                       |
| <b>VER-BI-OH(B)</b> | -0.18963     | -0.15912     | 0.83                 | 1.61                       |
| <b>VER-BIH-O(B)</b> | -0.17929     | -0.17137     | 0.21                 | 1.59                       |
| <b>VER-BI-OH(C)</b> | -0.19225     | -0.16184     | 0.82                 | 0.90                       |
| <b>VER-BIH-O(C)</b> | -0.18556     | -0.17436     | 0.30                 | 0.72                       |

## 2. Optimized Molecular Geometries for All Diradicals

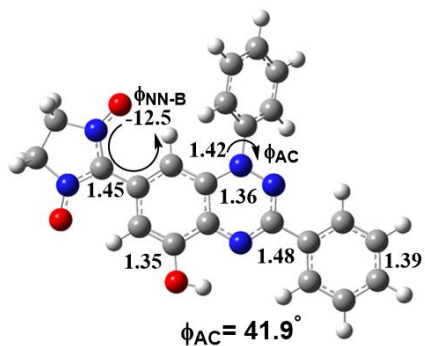

**NN-BI-OH(B)**

$$J = 563.7 \text{ cm}^{-1}$$

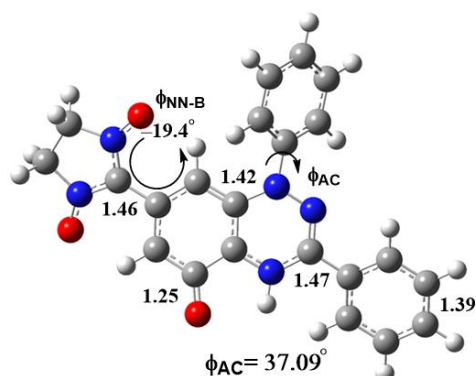

**NN-BIH-O(B)**

$$J = 369.2 \text{ cm}^{-1}$$

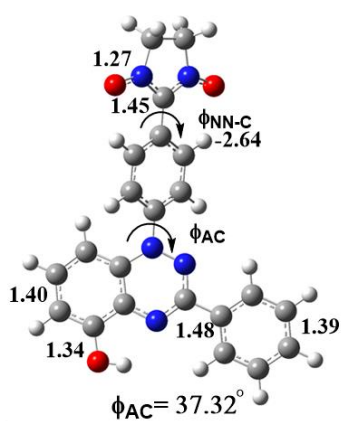

**NN-BI-OH(C)**

$$J = 296.1 \text{ cm}^{-1}$$

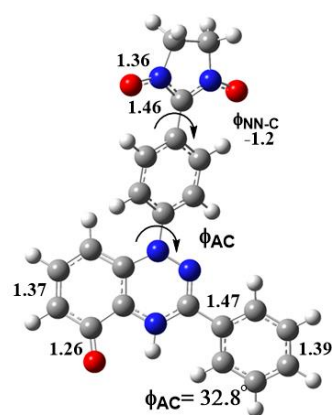

**NN-BIH-O(C)**

$$J = 211.9 \text{ cm}^{-1}$$

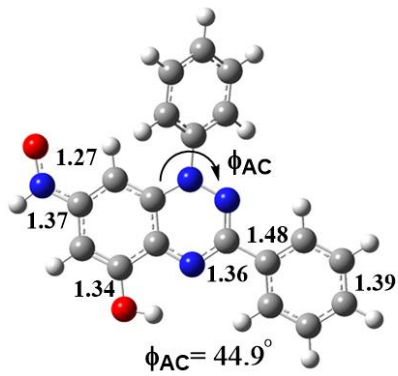

**NO-BI-OH(B)**

$J = -1510.9 \text{ cm}^{-1}$

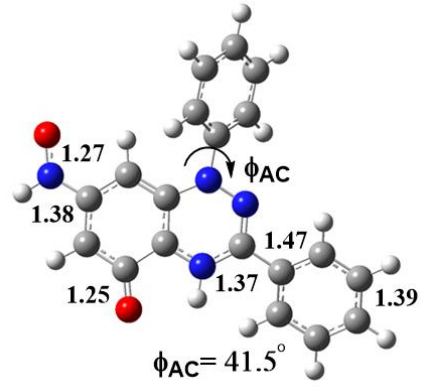

**NO-BIH-O(B)**

$J = -1099.4 \text{ cm}^{-1}$

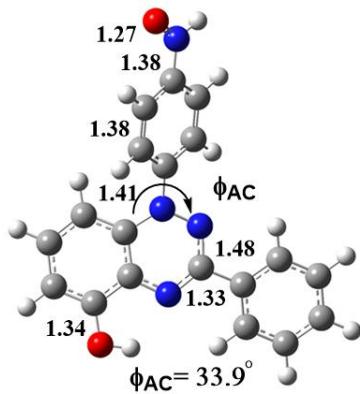

**NO-BI-OH(C)**

$J = -777.5 \text{ cm}^{-1}$

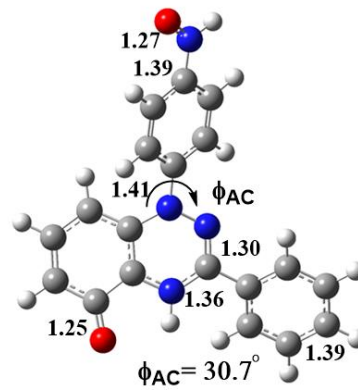

**NO-BIH-O(C)**

$J = -587.9 \text{ cm}^{-1}$

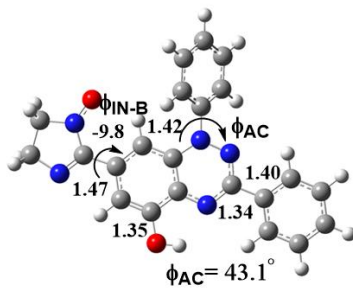

**IN-BI-OH(B)**

$J = 244.7 \text{ cm}^{-1}$

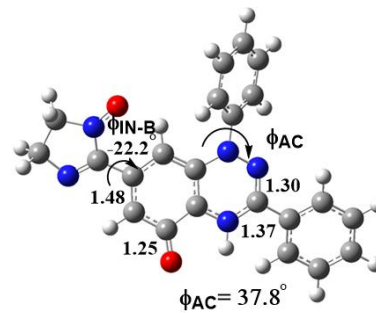

**IN-BIH-O(B)**

$J = 125.5 \text{ cm}^{-1}$

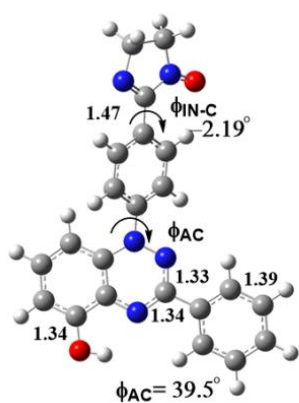

**IN-BI-OH(C)**  
 $J = 109.2\text{cm}^{-1}$

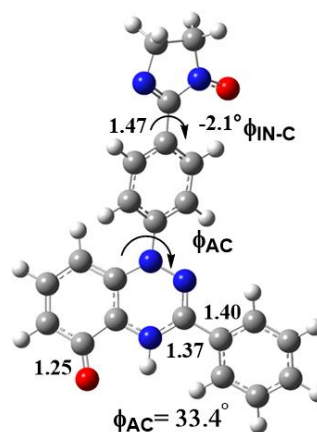

**IN-BIH-O(C)**  
 $J = 81.7\text{cm}^{-1}$

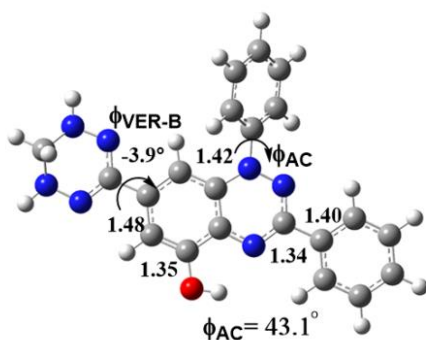

**VER-BI-OH(B)**  
 $J = 274.9\text{cm}^{-1}$

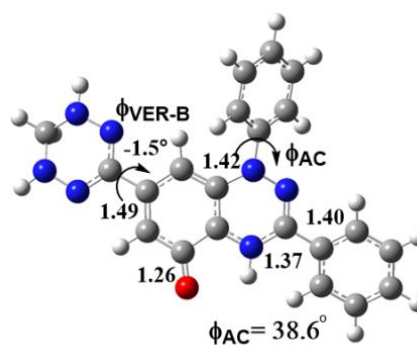

**VER-BIH-O(B)**  
 $J = 270.9\text{cm}^{-1}$

**Figure S2.** The ball-and-stick models for the optimized geometries of all diradicals with the calculated magnetic exchange spin coupling constants ( $J/\text{cm}^{-1}$ ). White spheres denote H atoms, gray, C atoms, blue, N atoms and red, O atoms.



### 3. Spin Density Plots of Energetically Favorable and Unfavorable Spin States

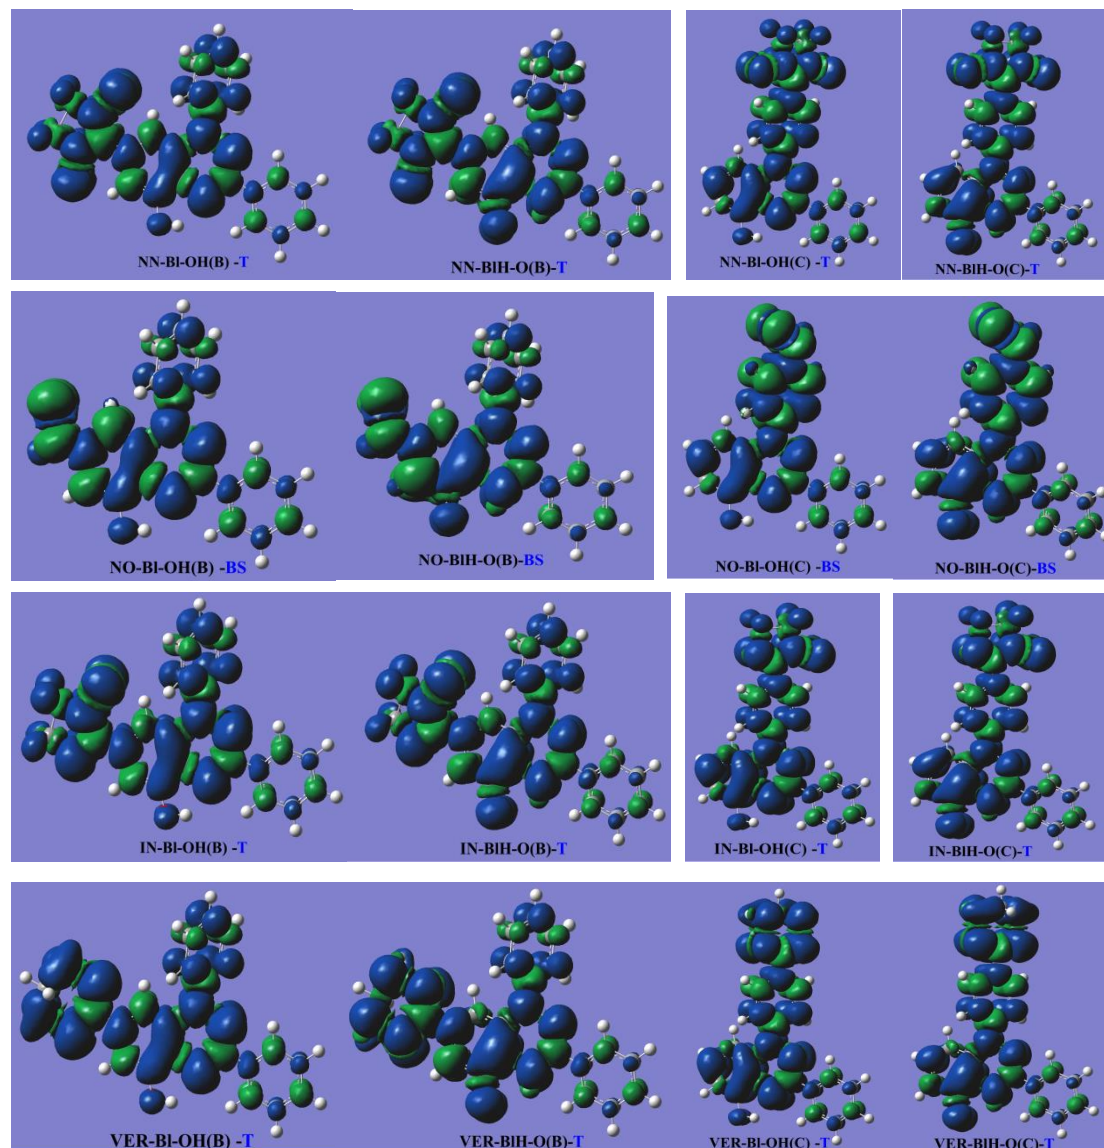

**Figure S3.** Spin density plots (isovalue = 0.0004) of ground states of all diradicals at the (U)B3LYP/6-31G (d, p) level.

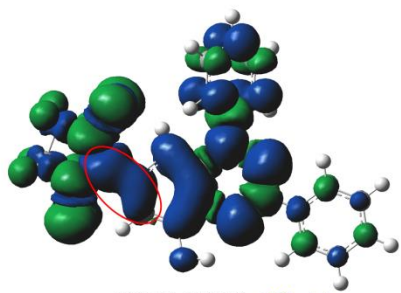

NN-BI-OH(B) BS state

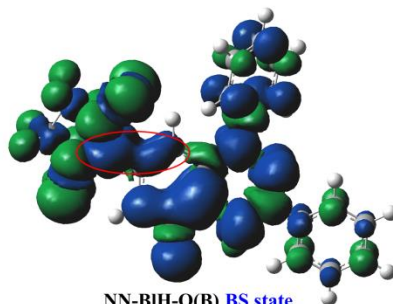

NN-BIH-O(B) BS state

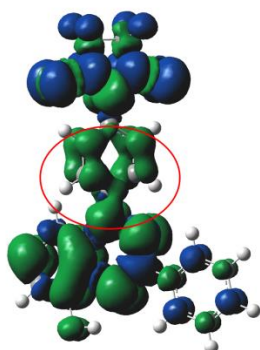

NN-BI-OH(C) BS state

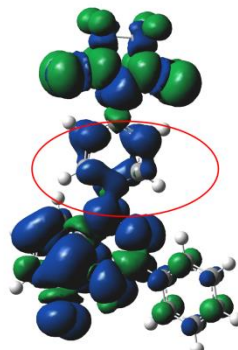

NN-BIH-O(C) BS state

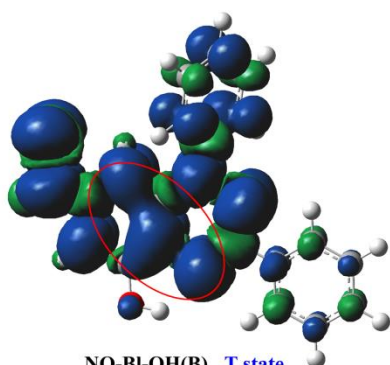

NO-BI-OH(B) T state

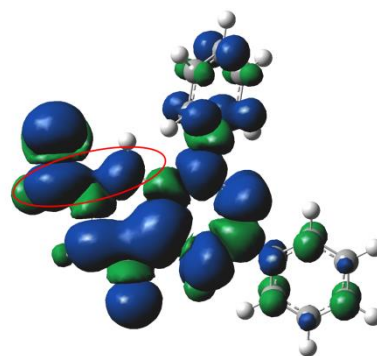

NO-BIH-O(B) T state

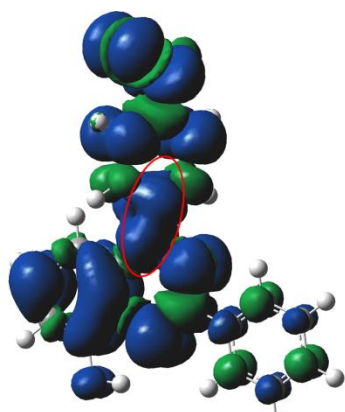

NO-BI-OH(C) T state

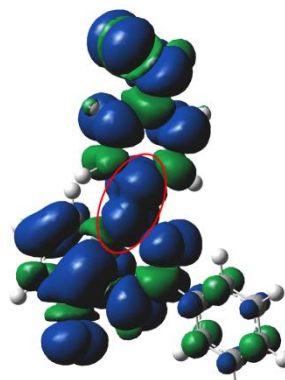

NO-BIH-O(C) T state

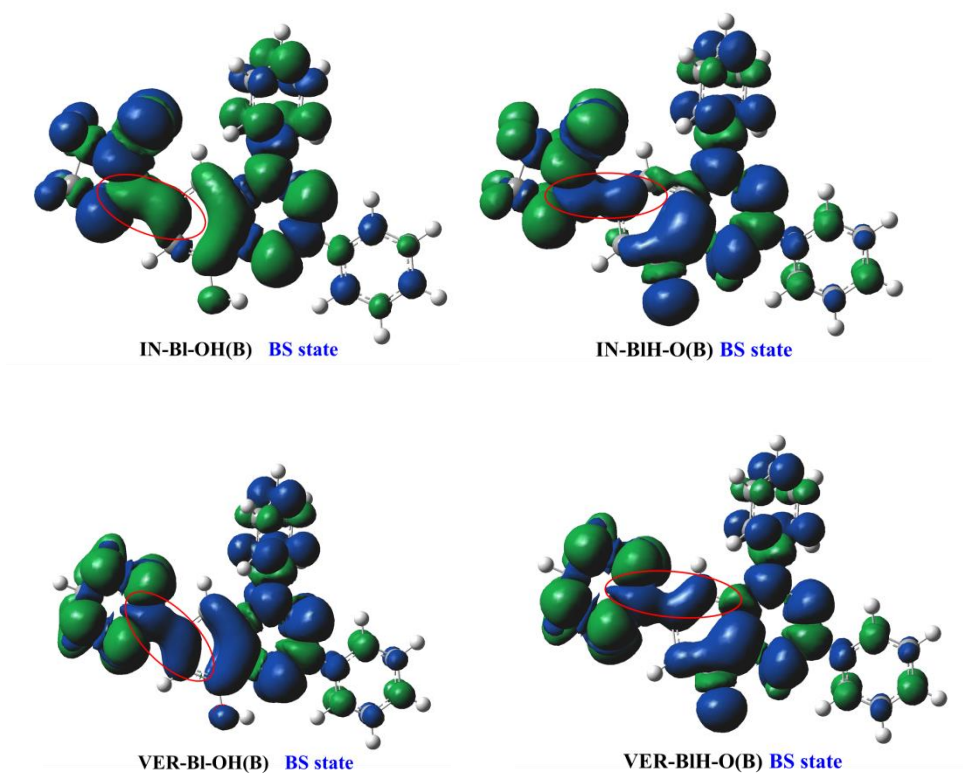

**Figure S4.** Spin density plots (isovalue = 0.0004) of energetically unfavorable spin states (not the ground states) for all diradicals. The red circles represent the mismatching of the spin polarization.

#### 4. SOMO Plots of Ground States for All Diradicals

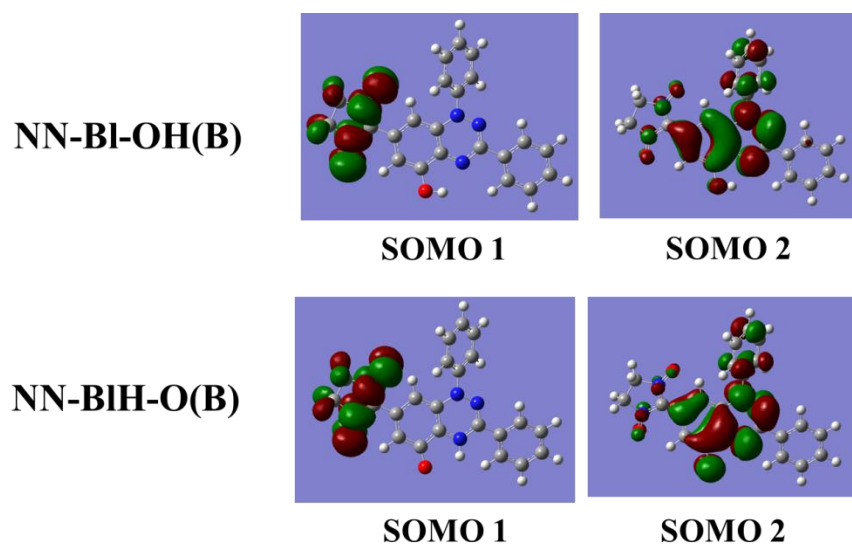

**NN-BI-OH(C)**

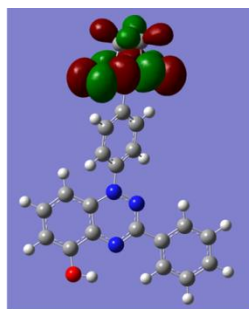

**SOMO 1**

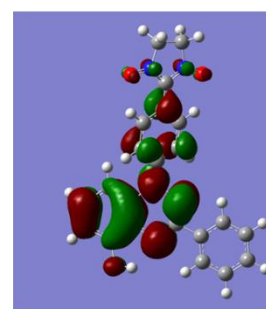

**SOMO 2**

**NN-BIH-O(C)**

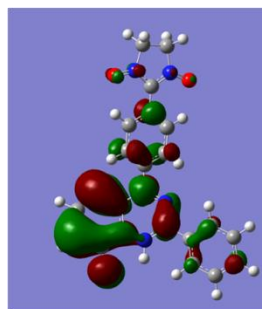

**SOMO 1**

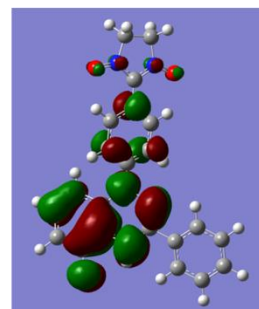

**SOMO 2**

**NO-BI-OH(B)**

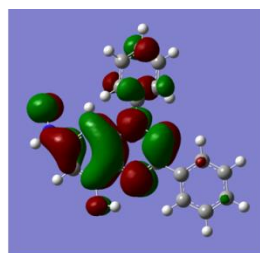

**SOMO  $\alpha$**

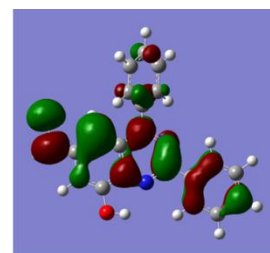

**SOMO  $\beta$**

**NO-BIH-O(B)**

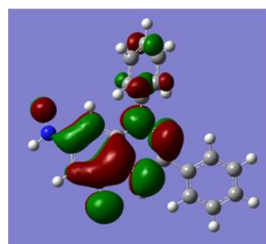

**SOMO  $\alpha$**

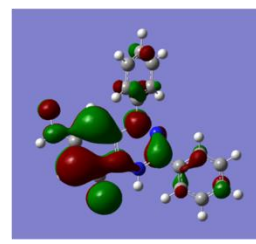

**SOMO  $\beta$**

**NO-BI-OH(C)**

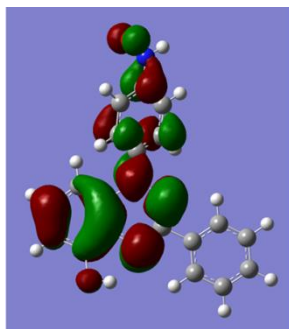

**SOMO  $\alpha$**

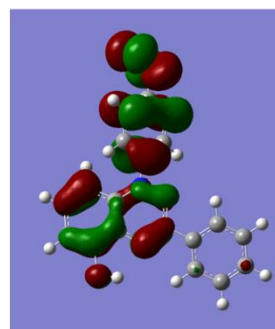

**SOMO  $\beta$**

**NO-BIH-O(C)**

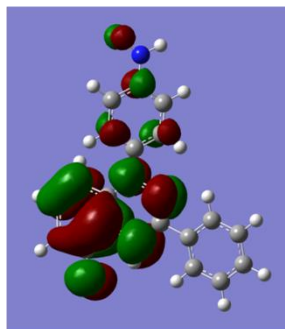

**SOMO  $\alpha$**

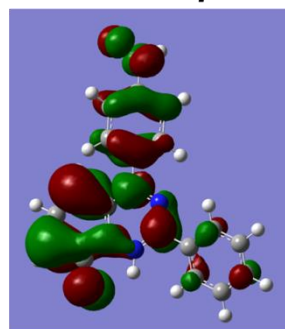

**SOMO  $\beta$**

**IN-BI-OH(B)**

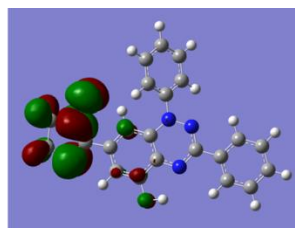

**SOMO 1**

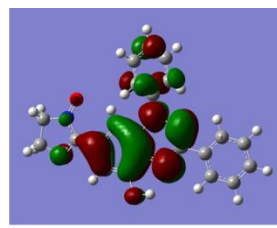

**SOMO 2**

**IN-BIH-O(B)**

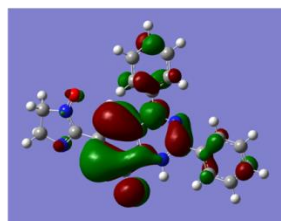

**SOMO 1**

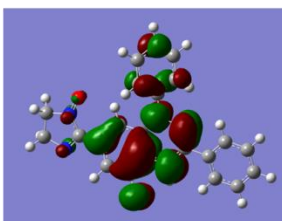

**SOMO 2**

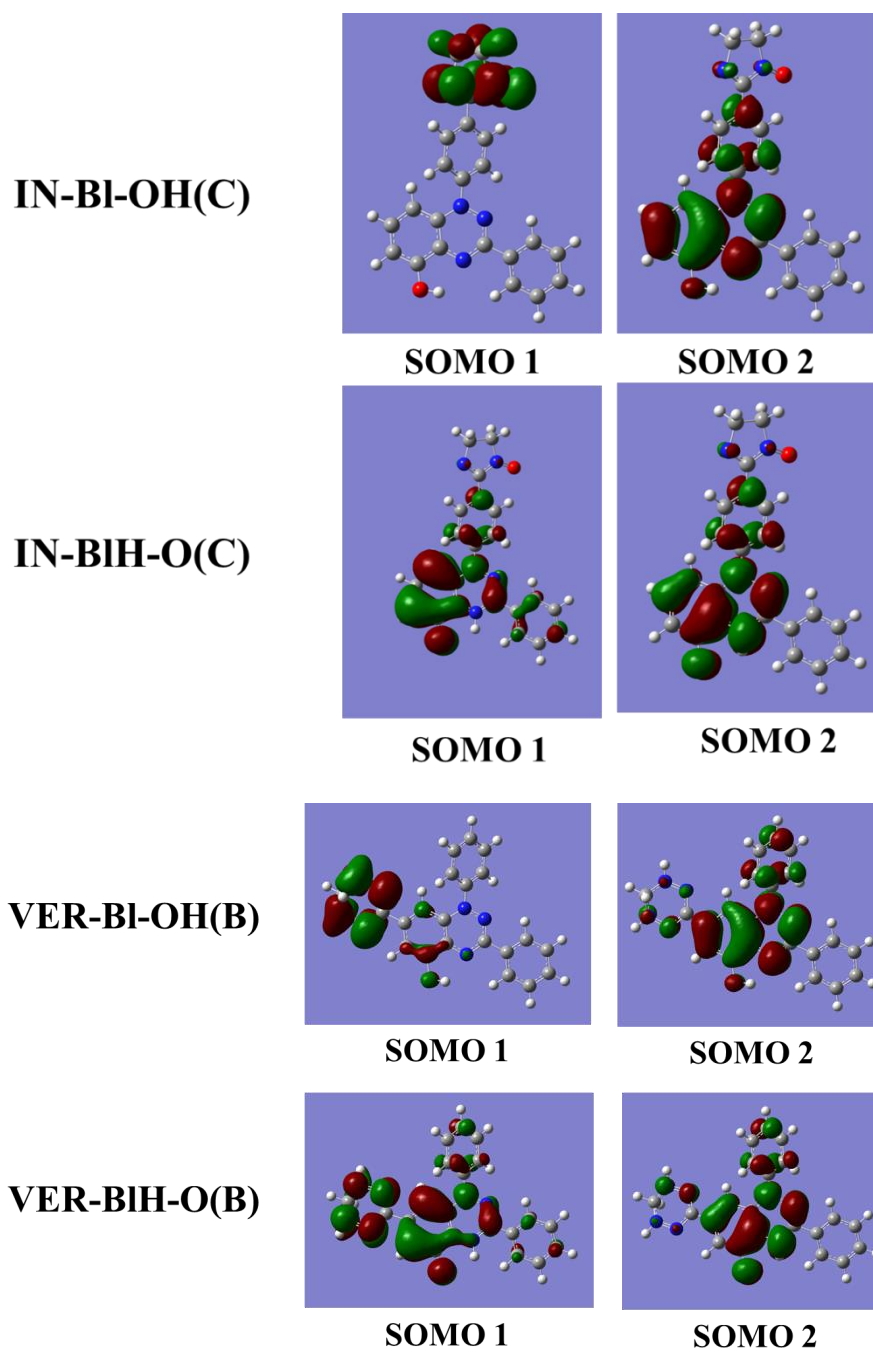

**Figure S5.** The SOMOs (isovalue = 0.02) for the T and BS states of all diradicals at the (U)B3LYP/6-31G (d, p) level.

## 5. Spin Alternation Plots and Spin Density Distributions

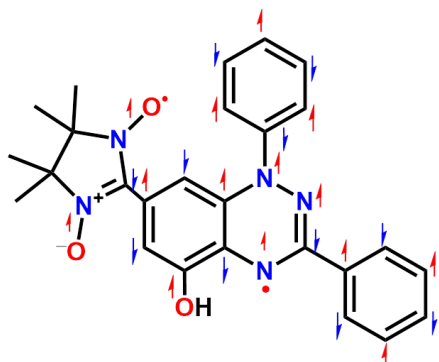

NN-BI-OH(B)

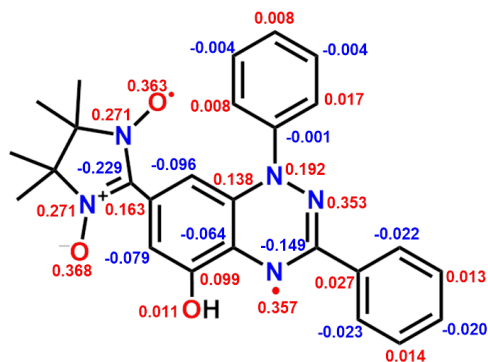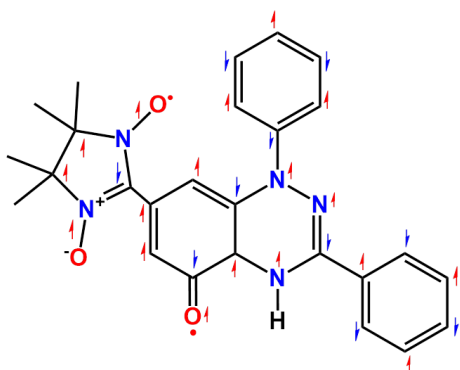

NN-BIH-O(B)

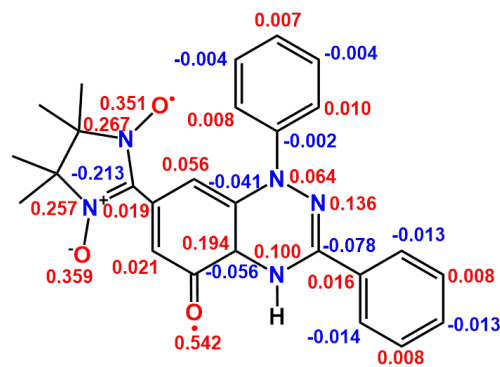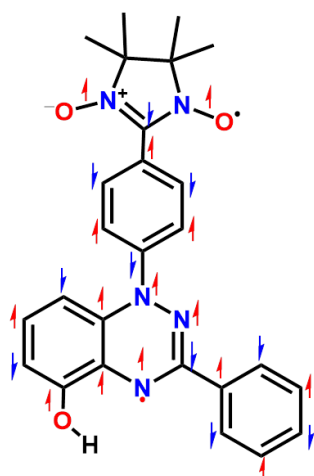

NN-BI-OH(C)

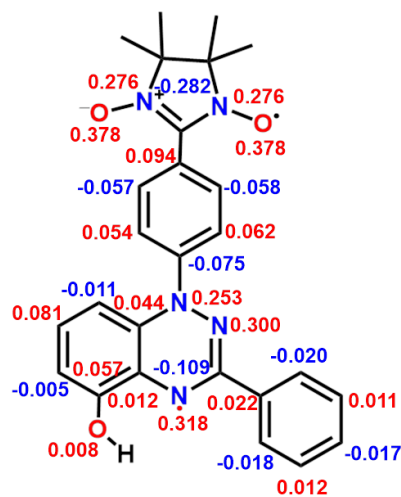

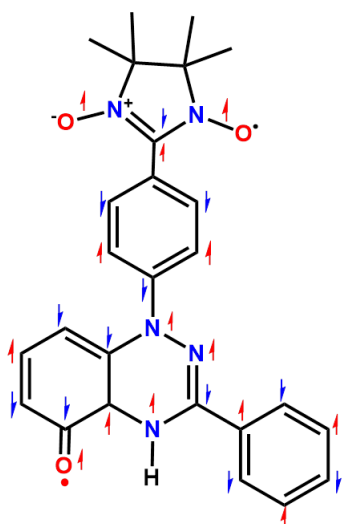

NN-BIH-O(C)

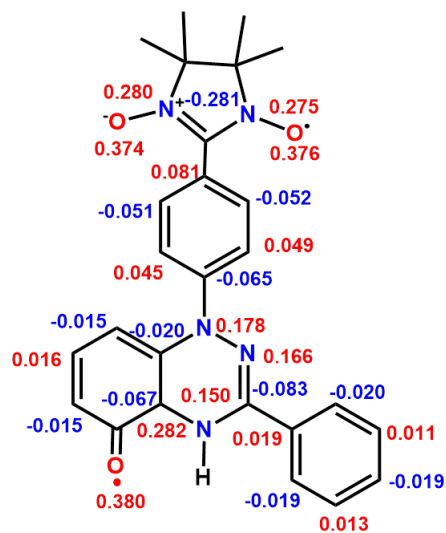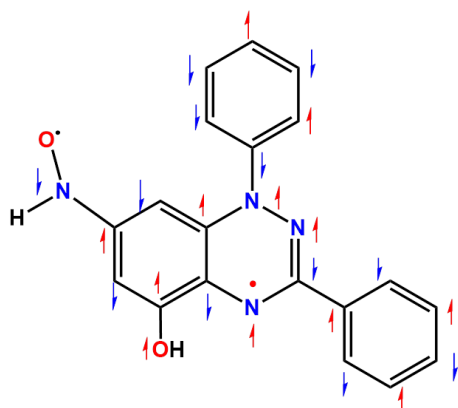

NO-BI-OH(B)

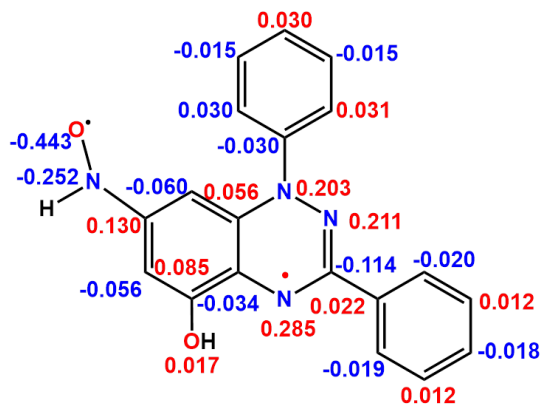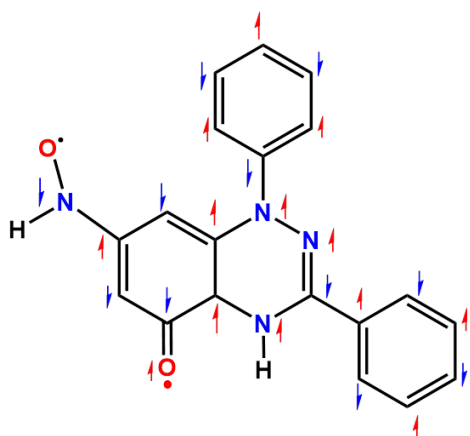

NO-BIH-O(B)

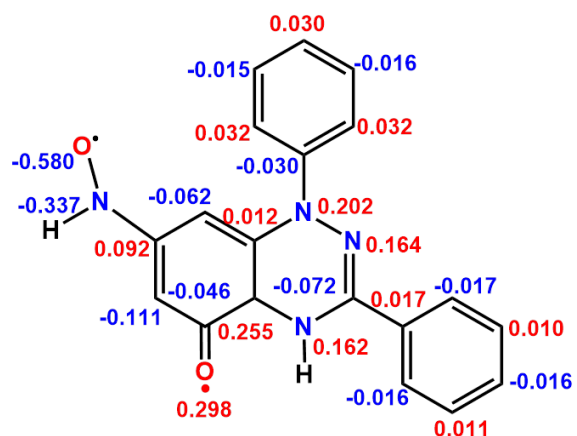



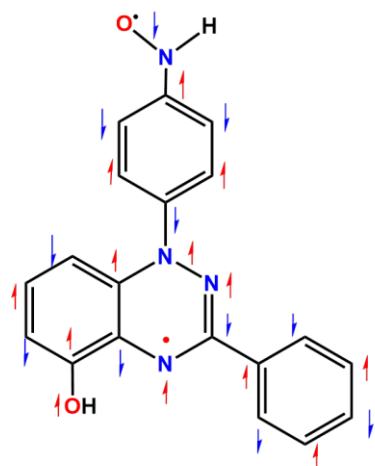

NO-BI-OH(C)

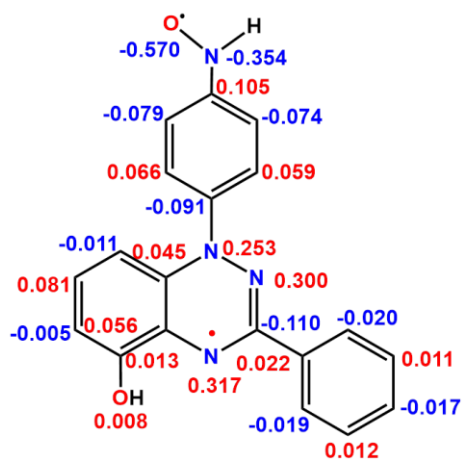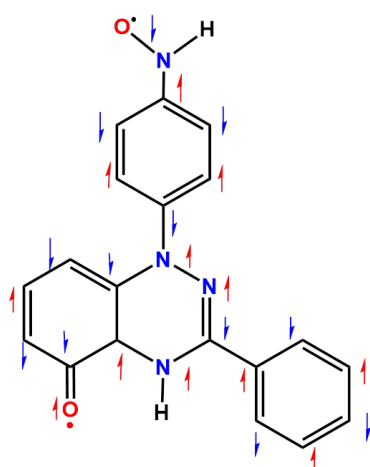

NO-BIH-O(C)

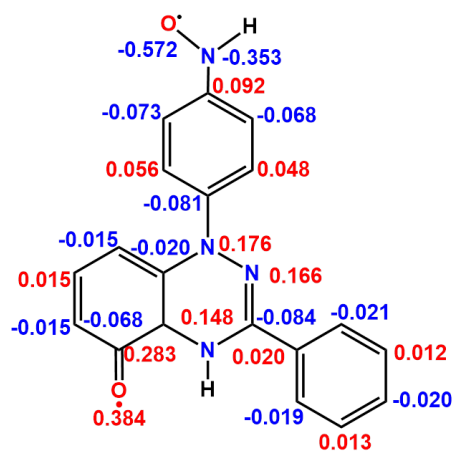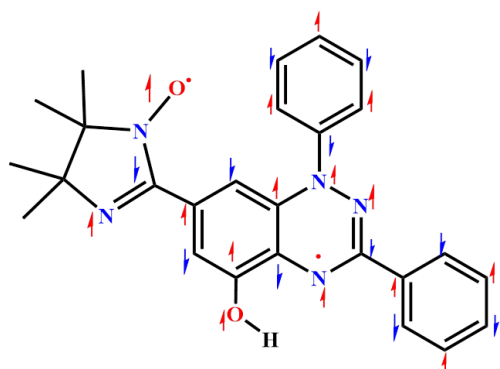

IN-BI-OH(B)

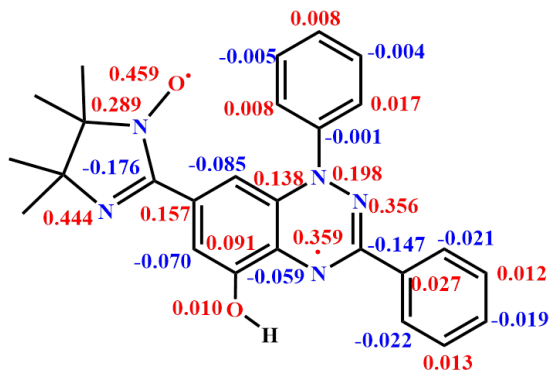

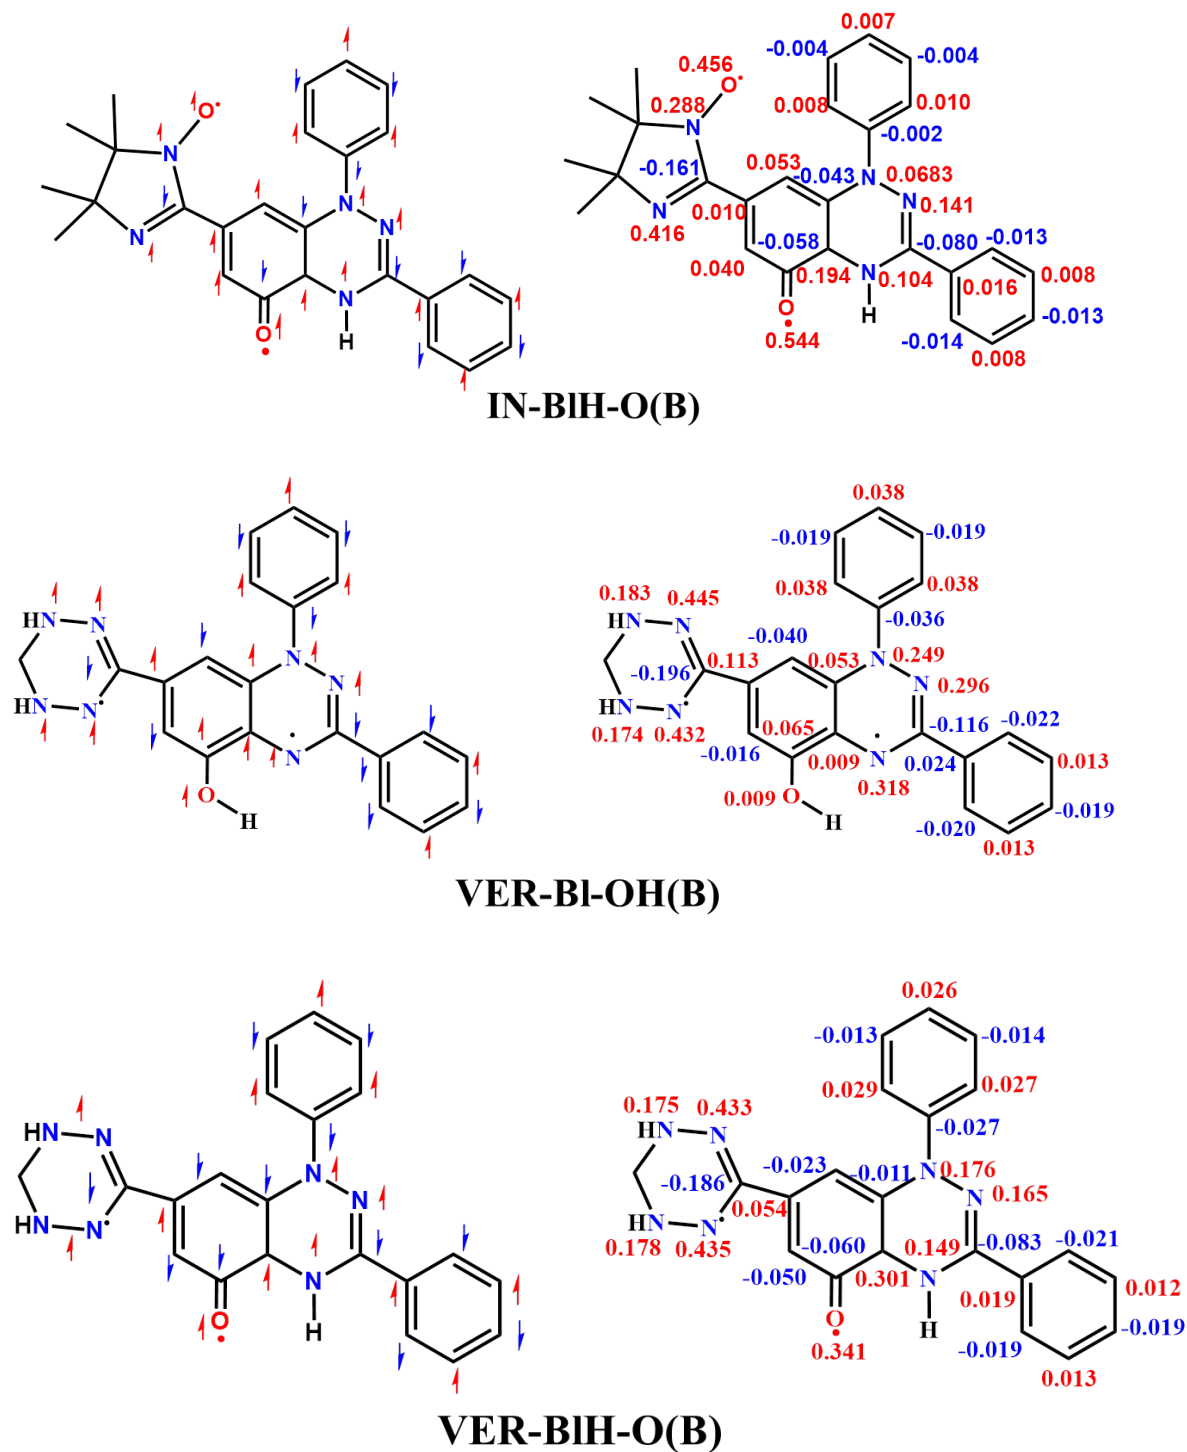

**Figure S6.** Spin density distributions (the right column, numbers) and scheme of spin alternation (the left column, up and down arrows) for all diradicals.
